# Supplementary material
Source: PubMed Central journal article supplement (PMC3500536)
Supplement: supp_112.198499_JPET190499_sup_data.pdf [file supp_112.198499_JPET190499_sup_data.pdf]

Identification of Human Butyrylcholinesterase Organophosphate-Resistant Variants through a  
Novel Mammalian Enzyme Functional Screen

Jun Zhang, Sigeng Chen, Erik C. Ralph, Mary Dwyer, John R. Cashman

JPET#198499

**Supplemental Data**

**Table 1. Primers used in construction of libraries 0-6**

| Primer Name   | Primer sequence                                                                                                                                        | Note                                                                       |
|---------------|--------------------------------------------------------------------------------------------------------------------------------------------------------|----------------------------------------------------------------------------|
| <b>KpnI_F</b> | 5' GC CGC GTC TTG GGT ACC ATG GAT<br>AGC AAA GTC ACA ATC A 3'                                                                                          | Forward beginning primer                                                   |
| <b>XhoI_R</b> | 5' CGC CAC TGC ATC TCG AGT TAG AGA<br>CCC ACA CAA CTT TCT TTC TTG C 3'                                                                                 | Reverse ending primer                                                      |
| <b>117_F</b>  | 5' GG ATT TAT GGT GGT NNK TTT CAA<br>ACT G GA ACA TC 3' <sup>a</sup>                                                                                   | For introducing site saturate mutations in 117 and 197 positions in lib 0. |
| <b>117_R</b>  | 5' GA TGT TCC AGT TTG AAA MNN ACC<br>ACC ATA AAT C 3' <sup>a</sup>                                                                                     |                                                                            |
| <b>197_F</b>  | 5' GTA ACT CTC TTT GGA NNK AGT GCA<br>GGA GCA GC 3' <sup>a</sup>                                                                                       |                                                                            |
| <b>197_R</b>  | 5' AGC TGC TCC TGC ACT MNN TCC AAA<br>GAG AGT TAC A 3' <sup>a</sup>                                                                                    |                                                                            |
| <b>I_F</b>    | 5' TAT GCA AAT TCT tgc tgt cag aac ata gat<br>caa agt ttt cca ggc ttc cat gga tca gag atg tgg aac<br>cca aac ACT GAC CTC 3' <sup>b</sup>               | For introducing random mutations in 65-84 positions in lib 1.              |
| <b>I_R</b>    | 5' TTC ACT GTC tgg tgg gtt acc cat ctc tga tcc<br>atg gaa gcc tgg aaa act ttg atc tat gtt ctg aca gca<br>AGA ATT TGC AT 3' <sup>b</sup>                |                                                                            |
| <b>II_F</b>   | 5' GCA CCT AAA CCA aaa aat gcc act gta ttg<br>ata tgg att tat ggt ggt ggt ttt caa act gga aca tca tct<br>tta cat gtt TAT GAT GGC AAG T 3' <sup>b</sup> | For introducing random mutations in 105-126 positions in lib 2.            |
| <b>II_R</b>   | 5' GCC ATC ATA AAC atg taa aga tga tgt tcc<br>agt ttg aaa acc acc acc ata aat cca tat caa tac agt<br>ggc att ttt TGG TTT AGG TGC T 3' <sup>b</sup>     |                                                                            |

|              |                                                                                                                                                |                                                                 |
|--------------|------------------------------------------------------------------------------------------------------------------------------------------------|-----------------------------------------------------------------|
| <b>III_F</b> | 5' GGT GGA AAT CCT aaa agt gta act ctc ttt<br>gga gaa agt gca gga gca gct tca gtt agc ctg cat ttg<br>ctt tct CCT GGA AGC CAT T 3' <sup>b</sup> | For introducing random mutations in 190-209 positions in lib 3. |
| <b>III_R</b> | 5' ATG GCT TCC AGG aga gaa caa atg cag gct<br>aac tga tga agc tgc tcc act ctt tcc aaa gag tga tac<br>act ttt AGG ATT TCC ACC A 3' <sup>b</sup> |                                                                 |
| <b>IV_F</b>  | 5' CTT CTG AAT GAG gca ttt gtt gtc ccc tat<br>ggg act cct ttg tca gta aac ttt ggt ccg acc gtg gat<br>ggt GAT TTT CTC ACT 3' <sup>b</sup>       | For introducing random mutations in 277-296 positions in lib 4. |
| <b>IV_R</b>  | 5' AGT GAG AAA ATC acc atc cac ggt cgg acc<br>aaa gtt tac tga caa agg agt ccc ata ggg gac aac aaa<br>tgc CTC ATT CAG A 3' <sup>b</sup>         |                                                                 |
| <b>V_F</b>   | 5' GTT AAT AAG GAT gaa ggg aca gct ttt tta<br>gtc tat ggt gct cct ggc ttc agc aaa gat aac aat agt<br>atc ATA ACT AGA AAA G 3' <sup>b</sup>     | For introducing random mutations in 325-344 positions in lib 5. |
| <b>V_R</b>   | 5' TTT TCT AGT TAT gat act att gtt atc ttt gct<br>gaa gcc agg agc acc ata gac taa aaa agc tgt ccc ttc<br>ATC CTT ATT AAC 3' <sup>b</sup>       |                                                                 |
| <b>VI_F</b>  | 5' TCC TCC AAG CTT ccg tgg cca gaa tgg atg<br>gga gtg atg cat ggc tat gaa att gaa ttt gtc ttt ggt<br>TTA CCT CTG GAA 3' <sup>b</sup>           | For introducing random mutations in 428-448 positions in lib 6. |
| <b>VI_R</b>  | 5' TTC CAG AGG TAA acc aaa gac ttc ttc ata<br>gcc atg cat cac tcc cat cca ttc tgg cca cgg AAG<br>CTT GGA GGA 3' <sup>b</sup>                   |                                                                 |

<sup>a</sup>For introducing saturation mutation at target positions. N = A, T, C, or G; K = G or T; M = C or A

<sup>b</sup>For random mutation library construction in the target amino acid region listed, respectively. Lower case positions contain 96% indicated nucleotide and 4% N (N = A, T, C, or G). Underlined positions represent silent mutations introduced into the library to differentiate mutations introduced in the library from background original clones to facilitate the cloning.

<sup>c</sup>Human BChE accessin number is M16541 in the NCBI database.
